# Supplementary material for: A novel p–n Mn0.2Cd0.8S/NiWO4heterojunction for highly efficient photocatalytic H2production
Source: Royal Society of Chemistry journal article supplement (doi:10.1039/d0dt02265a), 2020-01-01
Supplement: d0dt02265a1.pdf [file d0dt02265a1.pdf]

## Supplementary Data

### A novel p–n $\text{Mn}_{0.2}\text{Cd}_{0.8}\text{S}/\text{NiWO}_4$ heterojunction for highly efficient photocatalytic $\text{H}_2$ production

Table S1. The added amount of samples and reagents

| Sample                                                         | $\text{Mn}_{0.2}\text{Cd}_{0.8}\text{S}$ (mg) | $\text{NiCl}_2 \cdot 6\text{H}_2\text{O}$ (mg) | $\text{Na}_2\text{WO}_4 \cdot 2\text{H}_2\text{O}$ (mg) |
|----------------------------------------------------------------|-----------------------------------------------|------------------------------------------------|---------------------------------------------------------|
| $\text{Mn}_{0.2}\text{Cd}_{0.8}\text{S}/\text{NiWO}_4$ -10 wt% | 200                                           | 15                                             | 21                                                      |
| $\text{Mn}_{0.2}\text{Cd}_{0.8}\text{S}/\text{NiWO}_4$ -30 wt% | 200                                           | 47                                             | 65                                                      |
| $\text{Mn}_{0.2}\text{Cd}_{0.8}\text{S}/\text{NiWO}_4$ -50 wt% | 200                                           | 77                                             | 107                                                     |
| $\text{Mn}_{0.2}\text{Cd}_{0.8}\text{S}/\text{NiWO}_4$ -70 wt% | 200                                           | 109                                            | 151                                                     |
| $\text{Mn}_{0.2}\text{Cd}_{0.8}\text{S}/\text{NiWO}_4$ -90 wt% | 200                                           | 140                                            | 194                                                     |
| $\text{Mn}_{0.2}\text{Cd}_{0.8}\text{S}$                       | 200                                           | 0                                              | 0                                                       |
| $\text{NiWO}_4$                                                | 0                                             | 140                                            | 194                                                     |

Table S2.  $S_{\text{BET}}$ , pore volume and pore diameter of  $\text{Mn}_{0.2}\text{Cd}_{0.8}\text{S}$ ,  $\text{NiWO}_4$  and  $\text{Mn}_{0.2}\text{Cd}_{0.8}\text{S}/\text{NiWO}_4$ -30 wt% composite

| Sample                                                         | $S_{\text{BET}}^{\text{a}}$ ( $\text{m}^2 \text{g}^{-1}$ ) | Pore Volume <sup>b</sup> ( $\text{cm}^3 \text{g}^{-1}$ ) | Pore Diameter <sup>b</sup> (nm) |
|----------------------------------------------------------------|------------------------------------------------------------|----------------------------------------------------------|---------------------------------|
| $\text{Mn}_{0.2}\text{Cd}_{0.8}\text{S}$                       | 29.63                                                      | 0.054                                                    | 1.18                            |
| $\text{NiWO}_4$                                                | 172.16                                                     | 0.112                                                    | 1.50                            |
| $\text{Mn}_{0.2}\text{Cd}_{0.8}\text{S}/\text{NiWO}_4$ -30 wt% | 40.48                                                      | 0.074                                                    | 2.52                            |

<sup>a</sup>Gained by BET test.

<sup>b</sup> Relative pressure ( $P/P_0$ ) of 0.99.

Table S3. H<sub>2</sub> production activities of some related metal tungstates-based heterojunction

| Photocatalyst                                           | Light source                  | Sacrificial reagent                               | H <sub>2</sub> production rate<br>(mmol h <sup>-1</sup> g <sup>-1</sup> ) | Ref.                      |
|---------------------------------------------------------|-------------------------------|---------------------------------------------------|---------------------------------------------------------------------------|---------------------------|
| Mn <sub>0.2</sub> Cd <sub>0.8</sub> S/NiWO <sub>4</sub> | 300 W Xe lamp<br>(λ ≥ 420 nm) | Na <sub>2</sub> S/Na <sub>2</sub> SO <sub>3</sub> | 17.76                                                                     | <a href="#">This work</a> |

---

|                                                         |                               |                                                   |       |      |
|---------------------------------------------------------|-------------------------------|---------------------------------------------------|-------|------|
| Zn <sub>0.7</sub> Cd <sub>0.3</sub> S/NiWO <sub>4</sub> | 5W LED<br>(λ ≥ 420 nm)        | Na <sub>2</sub> S/Na <sub>2</sub> SO <sub>3</sub> | 15.95 | [S1] |
| CdS/NiWO <sub>4</sub>                                   | 300 W Xe lamp<br>(λ ≥ 420 nm) | lactic acid                                       | 5.07  | [S2] |
| NiWO <sub>4</sub> /CdS/Pt                               | 550W Xe lamp<br>(λ ≥ 420 nm)  | lactic acid                                       | 0.88  | [S3] |
| CdS/NiWO <sub>4</sub> /CoP                              | 5 W LED<br>(λ ≥ 420nm)        | lactic acid                                       | 47.7  | [S4] |
| CdS/InWO <sub>4</sub>                                   | 5W LED<br>(λ ≥ 420 nm)        | lactic acid                                       | 6.15  | [S5] |
| CdS/CdWO <sub>4</sub>                                   | 500W Xe lamp                  | Na <sub>2</sub> S/Na <sub>2</sub> SO <sub>3</sub> | 1.805 | [S6] |
| CdS/CdWO <sub>4</sub>                                   | 300 W Xe lamp<br>(λ ≥ 420 nm) | lactic acid                                       | 9.17  | [S7] |
| CdS/CoWO <sub>4</sub>                                   | 300 W Xe lamp<br>(λ ≥ 420 nm) | Na <sub>2</sub> S/Na <sub>2</sub> SO <sub>3</sub> | 15.91 | [S8] |

---

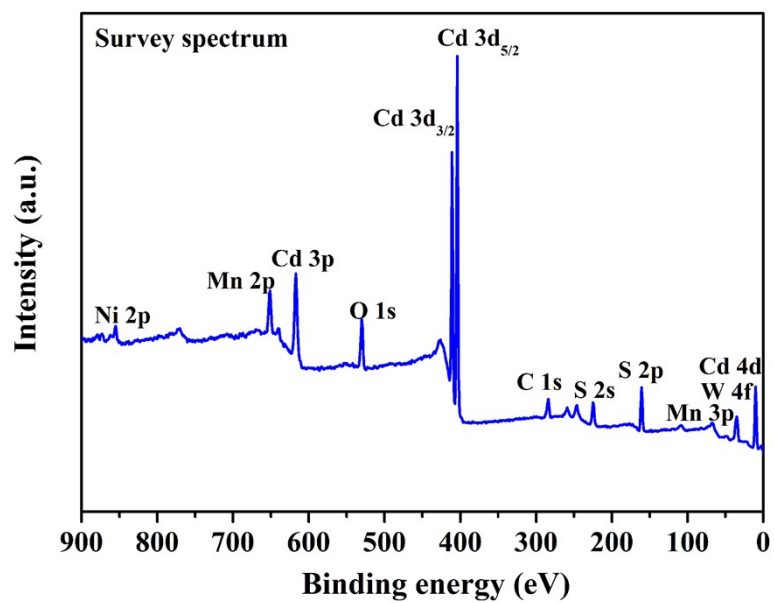

Fig. S1. XPS survey spectrum of  $\text{Mn}_{0.2}\text{Cd}_{0.8}\text{S}/\text{NiWO}_4$ -30 wt% composite



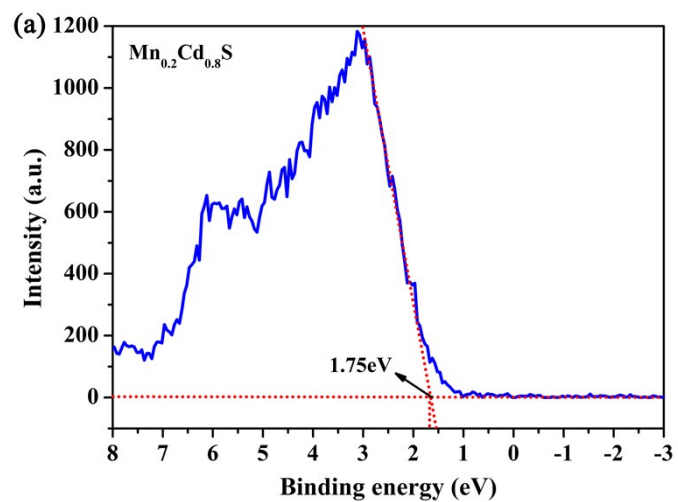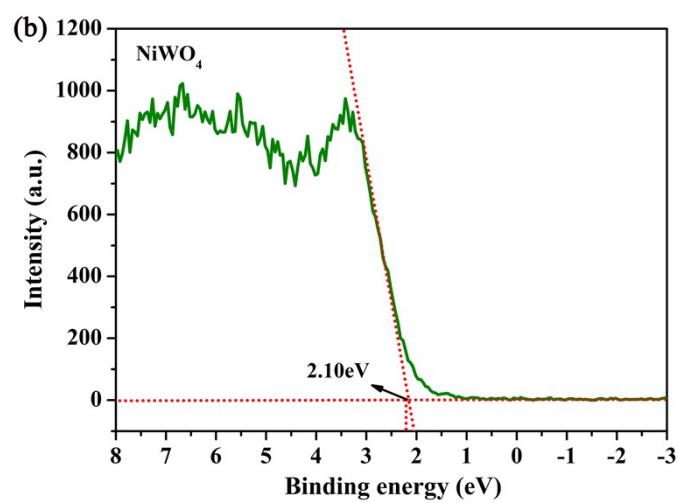

Fig. S2. XPS-VB of (a)  $\text{Mn}_{0.2}\text{Cd}_{0.8}\text{S}$  and (b)  $\text{NiWO}_4$

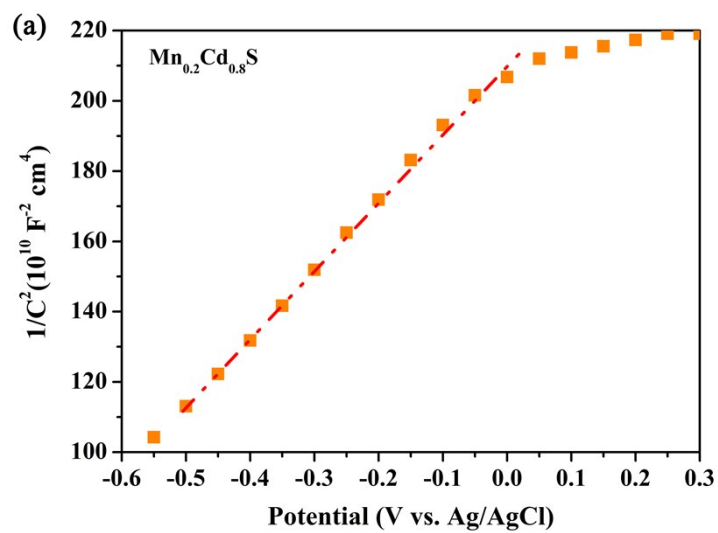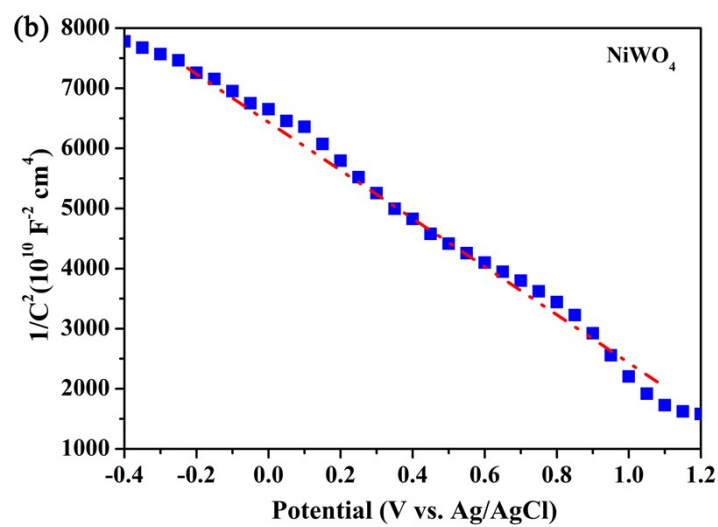

Fig. S3. Mott-Schottky polts of (a)  $\text{Mn}_{0.2}\text{Cd}_{0.8}\text{S}$  and (b)  $\text{NiWO}_4$ .



## REFERENCES

- S1 Y. Liu, G. N. Wang, Y. B. Li and Z. L. Jin, *J. Colloid Interf. Sci.*, 2019, **554**, 113–124.
- S2 Y. K. Zhang and Z. L. Jin, *Catal. Sci. Technol.*, 2019, **9**, 1944–1960.
- S3 M. J. Li, S. Yokoyama, H. Takahashi and K. Tohji, *Appl. Catal. B*, 2019, **241**, 284–291.
- S4 H. Liu, T. Yan, Z.L. Jin and Q.X. Ma, *New J. Chem.*, 2020, **44**, 1426–1438.
- S5 Q. Jian, X.Q. Hao and Z. L. Jin, *New J. Chem.*, 2019, **43**, 12668–12677.
- S6 L. Wang and W. Z. Wang, *CrystEngComm.*, 2012, **14**, 3315–3320.
- S7 X. Jia, M. Tahir, L. Pan, Z.F. Huang, X. W. Zhang and L. Wang, *Appl. Catal. B*, 2016, **198**, 154–161.
- S8 H. J. Cui, B. B. Li, Y. Z. Zhang, X. D. Zheng, X. H. Li and Z. Y. Li, *Int. J. Hydrogen Energy*, 2018, **43**, 18242–18252.
